# Supplementary material for: Mid and long-term ecological impacts of ski run construction on alpine ecosystems
Source: Springer Nature journal article supplement (doi:10.1038/s41598-020-67341-7), 2020-07-15
Supplement: 41598_2020_67341_MOESM2_ESM.pdf [file 41598_2020_67341_MOESM2_ESM.pdf]

**Mid and long-term ecological impacts of ski run construction on alpine ecosystems**

Csilla Hudek<sup>(a,d)\*</sup>, Elena Barni<sup>(b)</sup>, Silvia Stanchi<sup>(a,c)</sup>, Michele D'Amico<sup>(a)</sup>, Emanuele Pintaldi<sup>(a)</sup>, Michele Freppaz<sup>(a,c)</sup>

<sup>(a)</sup>University of Turin, Department of Agricultural, Forest and Food Sciences, Largo Braccini, 2, 10095 Grugliasco, Italy

<sup>(b)</sup>University of Turin, Department of Life Sciences and Systems Biology, Viale P.A. Mattioli, 25, 10125 Torino, Italy

<sup>(c)</sup>University of Turin, Natrisk, Largo Braccini, 2, 10095 Grugliasco, Italy

<sup>(d)</sup>Cranfield University, School of Water, Energy and Environment, College Rd, Cranfield, MK43 0AL, United

Kingdom

\*Corresponding author: Csilla.Hudek@cranfield.ac.uk

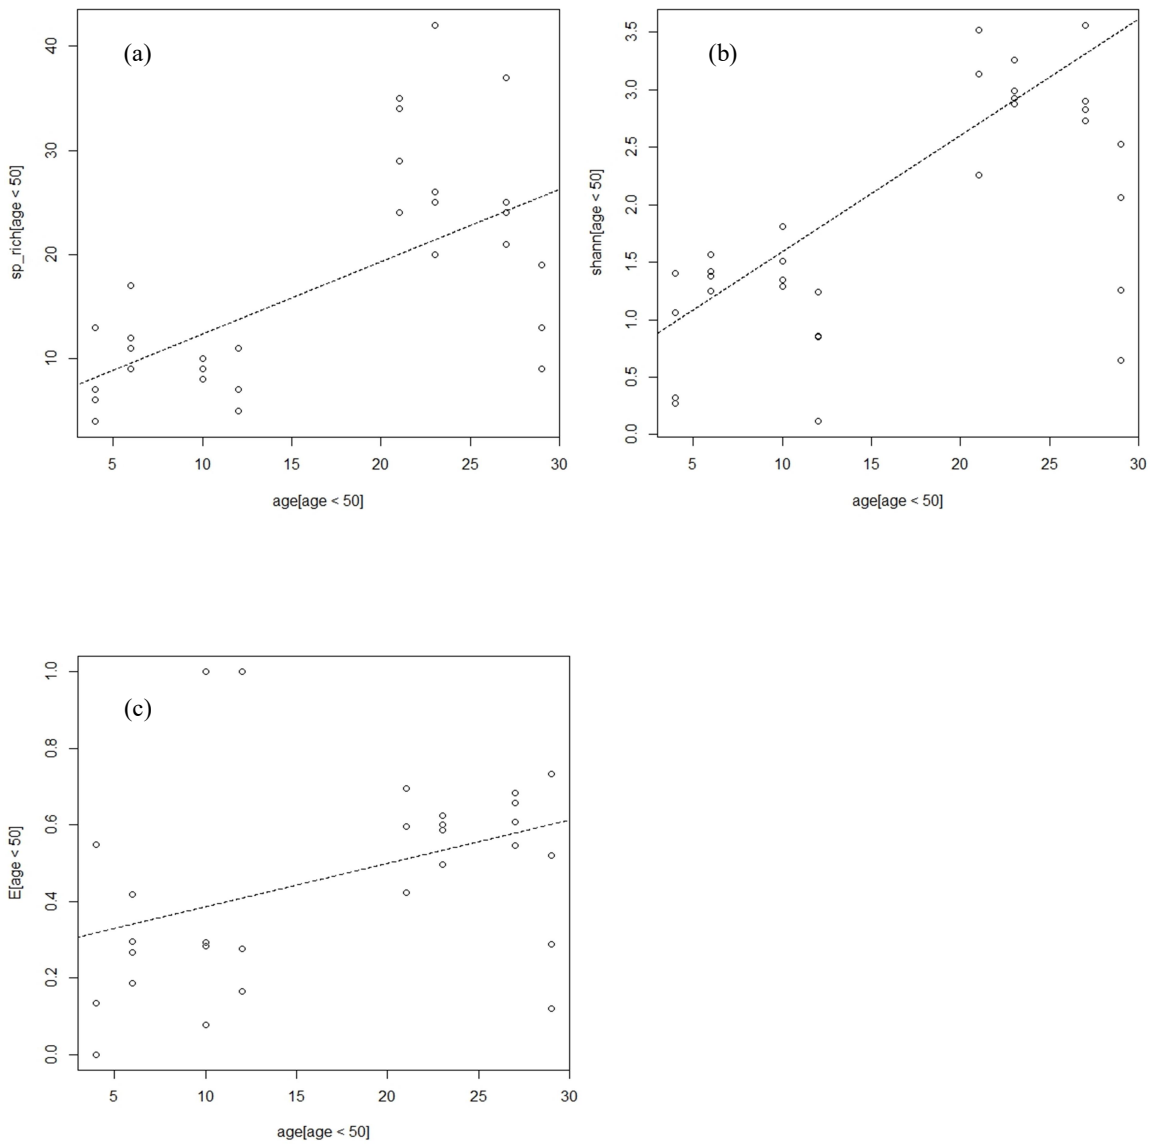

**Figure-1S** species richness (a) Shannon index (b) and evenness (c) of native species (pioneers + late successional) and changes on ski runs correlated to years after seeding.

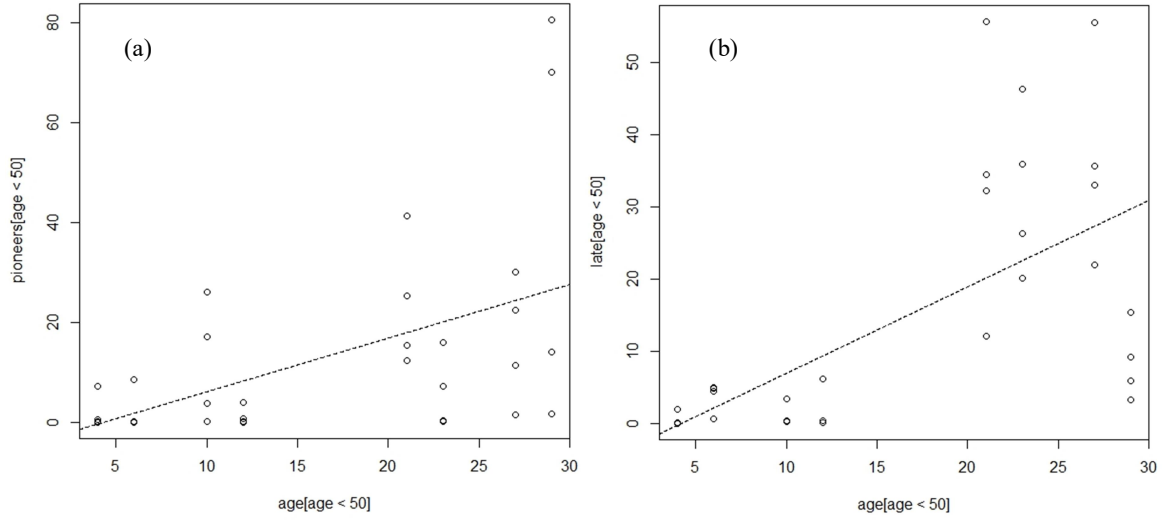

**Figure- S2** pioneer species (a) and late-successional species (b) cover changes on ski runs correlated to years after seeding.
